# Supplementary material for: Various Types of Virtual Reality-Based Therapy for Eating Disorders: A Systematic Review
Source: J Clin Med. 2022 Aug 24;11(17):4956. doi: 10.3390/jcm11174956 (PMC9456485; doi:10.3390/jcm11174956)
Supplement: Supplementary file 1 [file jcm-11-04956-s001.zip › Supplementary S2.xlsx]

## Sheet: 1
Reference	Study objectives	Study design	Diagnosis	Sample size	Control group (if any)	Session	Methods (questionnaires, protocols, scales, measures)	Methods (VR equipment)	Intervention (Virtual Reality task)	Outcomes		LEGEND:
Porras-Garcia et al. (2019)	Asses gender differences in AB toward specific wieght or nonweight-ralted body parts using a virtual reality VR-based embodiment technique and an eye-tracking AB assessment.	Forty-five women (23 with high BD and 22 with low BD) and 40 men (20 with high BD and 20 with low BD) were subsequently embodied in three virtual avatars, the first based on the participant's actual measurements, the second being larger than the participant, and the third being the same as the first avatar.	BD, BID	n=85 (45 W 23 high BD, 22 low BD and 40 M 20 high BD, 20 low BD)	n.a	1 session	EDI-3, EDI-BD	HTC VIVE eye-tracking (Pupil Labs) Blender 2.78 Unity 3D 5.5	Each participant was exposed to three virtual bodies: real-size VB; the second 40% larger than the participant (larger-size VB); and finally, a repetition of the first avatar, with the same body size as the participant (real-size VB-2). In each of the three exposures, both procedures were conducted in order to produce the FBOI and to measure the gaze behavior. Visuo-tactile stimulation procedure …	Women and men evaluate their appearance in different ways using an objective AB measure and showed completely different gaze behavior patterns toward their own body. Consistent with a previous pilot study, women showed a tendency to pay more attention than men to weight-related body areas in all body size conditions, whereas men paid more attention to nonweight-related body areas.		VR-CET	Body Exposure	Alternative
Nameth et al. (2021)	The integration of VR (both immersive and semi_x0002_immersive) with cue-exposure therapy (VR-CET) for binge-type eating disorders enhances treatment outcomes for refractory patients compared to CBT alone.	Adults previously treated for BED or BN with at least one objective or subjective binge episode/week were recruited from an outpatient university eating disorder clinic to receive up to eight weekly one-hour VR-CET sessions.	BN, BED	n=11 (n=9 complete full study)	n.a	8x1h VR CET session followed by an intervention phase (to six session). All participants chose 1/week format (7-8 weeks in total)	VR-CET protocol, VAS scale	Oculus Rift Oculus sensors MSI laptop Unity software	In the assessment phase, participants were first asked to rank their experience of cravings on a visual analog scale (VAS) from 0 to 100 for 30 different common binge foods and 4 environments (e.g., kitchen, dining room, bedroom, and restaurant/diner; total of 34 scenes).From this assessment, the VR computer software program created an individualized 13-step exposure hierarchy of the participant’…	Among participants purging at baseline, episodes decreased from a mean of one to zero/week, with 100% abstinence maintained at follow-up. The adoption of VR-CET into real-world clinic settings appears feasible and acceptable, with a preliminary signal of effectiveness. Findings, including some loss of treatment gains during follow-up may inform futuretreatment developmen.
Purvis et al. (2015)	Build upon existing research, and explore the utility of VR to elicit and detect changes in BID across various immersive virtual environment	Collage-aged women with elevated weight and shape concerns and a non-weight and shape concerned control group were randomly exposed to four virtual scenes with hight or low levels of body salience and social presence. Participants interact with avatars of thin, normal and overweight body size. Researchers measured participants minimum interpersonal distance, visual attention, approach preference …	BD, BID	n=77 (at-risk 37, control 40)	n=40 (WSC< 47)	1 session	WSC scale, BMI, EDE-Q, VR exposure	VR HMD NVisor SX111 2560x1024 Intersense3Cube (accelerometer) Worldviz PPT-H (camera system) Worldviz’s Vizard VR toolkitVR HMD NVisor SX111 2560x1024	1. Choosing the avatars between 18-27,5 BMI 2. Spending time on four different scenes	Control group reporting higher body satisfaction compared to At-risk group. Participants reported less body satisfaction in the populated beach scene compared to empty beach scene.
Pla-Sanjuanelo et al. (2017)	Assessed the validity of a VR-based software for cue exposure therapy (CET) in people with bulimia nervosa (BN) and binge eating disorder (BED).	Fifty eight outpatients (33 BN and 25 BED) and 135 healthy participants were exposed to 10 craved virtual foods and a neutral cue in four experimental virtual environments.	BN, BED	n=193 (58: 33 BN, 25 BED; 135: healthy)	n=135 (healthy participants)	1 session (40 min)	EDI-3, EDI-B, BMI, VR-CET	IntelPentumT4400 IV 4GB (laptop) 15.6-inch stereoscopic monitor Earphones Polarized glasses VR-based software for CET	Participants were exposed to 10 craved virtual foods and a neutral cue in four experimental virtual environments (kitchen, dining room, bedroom, and cafeteria). After exposure to each VR scenario, food craving and anxiety were assessed. The frequency/severity of episodes of uncontrollable overeating was also assessed and body mass index was measured prior to the exposure.	In both groups, craving and anxiety responses when exposed to the food-related virtual environments were significantly higher than in the neutral-cue virtual environment. However, craving and anxiety levels were higher in the clinical group.
Ferrer-Garcia et al. (2018)	6-month followup data of a randomized, multicenter, parallel-group study conducted at five clinical sites in three European cities, which compared two second-level treatments for bulimia nervosa (BN) and binge eating disorder (BED): virtual reality-based cue exposure therapy (VR-CET) versus additional cognitive behavioral therapy (A-CBT).	This article focuses on the evolution of symptoms assessed after 6 months of followup. 64 patients with eating disorders (EDs) (35 with BN and 29 with BED), who still showed active episodes of binge eating by the end of a structured CBT program (first-level treatment), were randomly assigned to one of two second-level treatments (A-CBT or VR-CET). Frequency of binge and purge episodes, and attitu…	BN, BED	n=64 (35 BN, 29 BED)	n.a	6-month followup, 6 twice-weekly individual 60-minute sessions held over 3 weeks	A-CBT, VR-CET	15.6-in 3D laptop Earphones Polarized glasses VR-based software for CET	During exposure, the patient was able to handle the virtual foods using the laptop’s mouse, but could not eat them (exposure with response prevention). Exposure to each hierarchy step ended when the partici_x0002_pant’s anxiety 40 level (assessed on a visual analog scale from 0 to 100 displayed on the laptop’s monitor) decreased by 40 percent in relation to the level registered at the start of th…	Although both treatment conditions showed statistically significant improvements at the end and after 6-month followup, obtained reductions were greater after VR-CET, regarding binge and purge episodes, as well as the decrease of self-reported tendency to engage in overeating episodes.
Manasse et al. (2021)	Delivering an ICT through virtual reality (VR) technology should increase inter_x0002_vention power because 3D imagery and actual real hand/arm movements are lifelike and may improve compliance because the VR environment is highly engaging.	Participants with once-weekly loss-of-control (LOC) eating use the VR ICT daily, at home, for two weeks, and measured feasibility, acceptability and change in LOC eating at post_x0002_intervention and 2-week follow-up	LOC, BED	n=14	n.a	13 days, and 2-week follow up.	EDE, TRAQ, TEQ, UPPS, DERS, Sham Taste Test, VR ICT	Acer Predator Helios 300 laptop, Oculus Rift Hand controllers and sensors Maya 3D modeling software	Assessments occurred at baseline, post-intervention, and 2-week follow-up. Go/NoGo Task and pre- and post-intervention in order to assess the effects of the VR ICT on inhibitory control.“Go” stimuli based on items that should be conceptually (and obviously) distinct from the “No Go” stimuli so that implicit learning based on very quick presentation of the stimuli could occur without confusion.	Results from this initial pilot indicate that delivering ICT through VR is feasible, acceptable, and is associated with reductions in binge eating.
Porras-Garcia et al. (2021)	To provide further evidence of the efficacy of an enhanced (embodiment) VR-based body exposure therapy for the treatment of AN.	Experimental group received TAU (Treatment as usual) treatment and 5 adiitional sessions of VR-based body exposure therapy, while the control group received only TAU. Every groups are AN patients.	AN	n=35 (16 experimental, 19 control group) every AN patients	n=19 (AN patients)	3 months treatment; 5 session of VR-MET of 45min + TAU	VAS scale, BMI, PASTAS, EDI-3, BAS, BIAS-BD, TAU, VR exposure	HTC VIVE HMD FOVE VR-HMD (for eye-detectors) Blender 2.78 Unity 3D 5.6.1	1. Pre-assesment - photo procedure to create real size virtual body and measurements 2. Patients in experimental group described what they think about different parts of the virtual body from head to shoes 3. TAU	ED symptomps were clearly reduced in both groups,with most of the changes being more noticable in the experimental group.
Matsangidou et al. (2020)	To explore Multi-User Virtual Reality and demonstrate the positive effect of using MUVR remote psychotherapy to enhance traditional therapeutic practices.	MUVR remote psychotherapeutic session for patients and participants with hight risk Eating Disorders.	AN, BN or high risk	n=23	n.a	1 session (1h)	WSC scale, EDDS scale, MUVR exposure	Oculus Rift HMD Oculus Touch Controller Oculus Sensors Unity3D 5.0 Steam VR Adobe Fuse CC Maya v. 2016 (Unity assets) Salsa Lip-Sync RandomEyes 1.5.5 PhotonVoice 1.16 Photon Unity Networking 1.91 Open Broadcaster (Software 23.0.1)	1. Setting up the avatar 2. MUVR Remote Psychotherapy sessions: three therapeutic virtual enviroment (therapist and patient have VR-HMD)	MUVR may present with the advantage of providing patients with an anonymous non-threatening and non-judgmental platform to comunicate thoughts and feelings without removing the availability of real therapist.
Porras-Garcia et al. (2020)	To evaluate the usefulness of virtual reality‐based body exposure software for the assessment of important body‐related cognitive and emotional responses in AN.	Participants owned a virtual body that had their silhouette and body mass index. Full‐body illusion (FBI) over the virtual body was induced using both visuo‐motor and visuo‐tactile stimulation. Once the FBI was induced, the FBI itself, FGW, body anxiety and body‐related attentional bias toward weight‐related and non‐weight‐related body areas were assessed.	AN, BD	n=73 (30 AN, 43: 25 low BD, 18 high BD)	n.a	1 session	BMI, EDI-3, EDI-BD, PASTAS, BIAS‐BD, BAS, VAS scale, VR exposure	HTC-VIVE HMD Computer with Nvidia RTX 2080 (graphic card) HMD FOVE (Eye Tracking) Hand controllers Body trackers FOVE setup 0.16.0 Unity 3D 3.0.0 Blender 2.78	FBI was induced using two procedures: visuo‐motor and visuo‐tactile stimulation. Once inside the virtual environment, all participants could observe themselves in the first‐person perspective and look at themselves in a mirror (in the third‐person perspective). The movements were carried out in a structured way, and the procedure lasted one and a half minutes. The visuo‐tactile stimulation consis…	Results provide evidence about the usefulness of virtual reality‐based body exposure to elicit FGW and other body‐related disturbances in AN patients.
Mountford et al. (2015)	To determine if a VR environment could elicit increased BID in a nonclinical group of women who were dieting due to body image concerns or nonclinical women who were not dieting.	Forty-one nonclinical females participated in the VR paradigm (a London Bus Journey), completing pre and post measures of body image satisfaction, and social evaluative concerns.	BD, BID	n=36	n=18 (nonclinical women)	1 session (1h)	EDE-Q, Restraint Scale, FNAES, LSAS, BISS,VAS scale	nVisor SX111HMD Headphones Unity software package by Ari Jacobs of ‘‘I’m VR’’ IS900 VET tracking system	The virtual environment was a 4-minute journey on a London bus. Participants entered the 4-minute VR bus journey, in which they were asked to ‘‘form some impression of what you think about the people on the bus and what they think about you.’’Participants wore the headset and could move through the virtual environment on the bus by walking and whole body turning. Participants were not able to see…	Results did not support the hypothesis that the virtual London Bus would elicit increased BID. VR might have potential in the treatment of disturbed body image, while highlighting the need for further research into the required levels of representational and behavioral fidelity of virtual environments and avatars.
Serino et al. (2019)	To report the use of this VR protocol within a multidisciplinary treatment of AN.	A patient with a Diagnostic and Statistical Manual‐5 diagnosis of AN underwent an intensive multidisciplinary outpatient treatment (three sessions of a VR‐based body swapping illusion).	AN	n=1	n.a	12 weeks and 1‐year follow‐up	Embodiment Questionnaire, VR‐based body swapping	Oculus Rift DK2 Razer Hydra MakeHuman Unity3D	Three sessions of a VR‐based body swapping illusion (the experimental illusion of being the owner of a virtual body thanks to a visuotactile stimulation) were delivered: one at the beginning of the treatment (Time 1), one at the end of a cycle of the treatment (Time 2), and one at 1‐year follow‐up (Time 3).	Represent an innovative method to specifically reduce bodily concerns.
Irvine et al. (2020)	Tested the efficacy of a training programme, delivered in VR, to modify the perceptual boundary between what participants classify as a fat versus thin body.	Three cohorts of 20 female volunteers with high body image concerns were recruited to two intervention groups and one control group. Both intervention group were given inflationary feedback to shift their categorisations of the stimulus models towards higher BMIs.	BD, BID	n=60 (3 groups)	n=20	14 days	EDE-Q, BSQ-16b, BDI, RSE, Vr exposure	Oculus Rift with Touch controllers Unreal Engine 4.18	On Day 1, participants’ weight and height were measured, and the questionnaires were completed in randomised order. Participants were then instructed on how to wear the Oculus Rift headset, adjust the focus to ensure the stimulus was clearly visible, and shown how to use the Touch Controllers. They then carried out the first baseline measurement, followed by the first training sequence. On Days 2…	Compared to controls, both intervention groups experienced statistically significat reductions in their concerns about their own body shape, weight and eating habits. Manipulating categorical perception in VR might provide a complementary addition to existing treatments for eating disorders.
Keizer et al. (2016)	To provide that a Full Body Illusion (FBI) affects body size estimation of body parts more emotionally salient than the hand.	In the FBI, analogue to the RHI, participants experience ownership over an entire virtual body in VR after synchronous visuo-tactile stimulation of the actual and virtual body.	AN	n=59	n=29 (healthy participants)	1 session (3h)	BAT, EDI-II, VR exposure, EQ	Oculus Rift DK2 Unity3D Blender MakeHuman Razer Hydra	Participants estimate their body size (shoulders, abdomen, hips) before the FBI was induced, directly after induction and at 2 hour 45 minutes follow-up.	AN patients decrease the overestimation of their shoulders, abdomen and hips directly after the FBI was induced.
Paslakis et al. (2017)	To provide VR exposure would lead to habituation of the urge to be physically active.	The female patients with anorexia nervosa and bulimia nervosa was applied as a novel highly immersive 3-D exposure paradigm. Patients were asked to rate their acute urge to be physically active during the exposure procedure.	AN, BN	n=30 (20 AN, 10 BN)	n.a	1 session (32 min jogging video)	BMI, smQ, EDE-Q, EDS-21, CET, saliva samples (a-amylase, cortisol, and cortisone) and blood (leptin)	no information about the type of VR equipment used / no information about the type of camera 360 used to make jogging video	Patients are exposed to physical activity simulated in a virtual reality (VR) environment. Patients wear VR goggles and watch a jogger’s running track from the first-person perspective, as if it were them actually jogging.They are able to turn their head to both sides while jogging, look up to the sky or down to their shoes; it is also possible to turn their heads back and take a look at the surr…	Inclusion in the general treatment of eating disorders of an additional treatment component addressing the acute urge to be physically active would lead to additional benefits for patients who suffer from it.
Ferrer-Garcia et al. (2017)	To provide that second-level treatment is effective for patients with recurrent binge eating who fail first-level treatment.	Assessed the effectiveness of virtual reality-CET as a second-level treatment strategy for 64 patients with bulimia nervosa and binge eating disorder who had been treated with limited results after using a structured CBT programme, in comparison with A-CBT.	BN, BED	n=65	n.a	3 weeks, 6 session (60min)	EDI-3, FCQ-T, STAI-S, STAI-Y, STAI-T, FCQ-S, FCQ-T, The VR-CET sessions	15.6-in sterescopic monitor Earphones Polarized glasses VR-CET software	Software comprises a library of 30 virtual foods frequently consumed by patients with BED and BN during binge eating episodes and four everyday real-life VR environments (kitchen, dining room, bedroom and cafeteria) where they usually binge. The software created a first individualised exposure hierarchy by combining the four virtual environments and the ten foods that produced the highest levels …	The current study evaluated the effectiveness of VR-CET as a second-level treatment strategy for patients with ED characterised by recurrent binge eating (i.e. with BN or BED) who were initially treated unsuccessfully with a structured CBT programme and compared it with A-CBT.
ABBREVIATIONS
AB - Attentional Bias
AN - Anorexia Nervosa
BAS - Body Appreciation Scale
BAT - Body Attitude Test
BD - Body Disturbance
BDI - The Beck Depression Inventory
BED - Body
BIAS-BD - The body Image Assessment Scale Body Dimensions
BID - Body Image Disturbance
BISS - Body Image States Scale
BN - Bulimia Nervosa
ED - Eating Disorders
EDDS - Eating Disorder Diagnostic Scale
EDI-3 Eating Disorder Inventory
EQ - the Embodiment Questionnaire
FCQ-T - the Food Craving Questionnaire Trait
FNAES - Fear of Negative Appearance Evaluation Scale
HMD - Head mounted display
ITC-SOPI - The revised version of the ITC-Sense of Presence Inventory
LOC - loss-of-control eating
LSAS - Liebowitz Social Anxiety Scale.
PASTAS - Phycial Appearance State and Trait Anxiety Scale
RJPQ - The Reality Judgment and Presence Questionnaire
RSE - The Rosenberg Self-Esteem Scale
TAU - Treatment as usual
VR - Virtual Reality
WSC Scale - The Weight Concerns Scale
